# Supplementary material
Source: PubMed Central journal article supplement (PMC7113825)
Supplement: jamapsychiatry-77-823-s001.pdf [file jamapsychiatry-77-823-s001.pdf]

## Supplementary Online Content

Sun BZ, Moster D, Harmon QE, Wilcox AJ. Association of preeclampsia in term births with neurodevelopmental disorders in offspring. *JAMA Psychiatry*. Published online April 1, 2020. doi:10.1001/jamapsychiatry.2020.0306

**eTable.** Characteristics of Participants With and Without Missing Covariate Data

This supplementary material has been provided by the authors to give readers additional information about their work.

**eTable.** Characteristics of Participants With and Without Missing Covariate Data

|                                            | Complete Data<br>(N = 938,935) | Missing Covariate Data<br>(N = 41,625) |
|--------------------------------------------|--------------------------------|----------------------------------------|
| Gestational age, mean (SD), wk             | 39.8 (1.4)                     | 39.7 (1.4)                             |
| Birth weight, mean (SD), g                 | 3,630 (498)                    | 3,489 (490)                            |
| Female sex, n (%)                          | 457,967 (49%)                  | 20,304 (49%)                           |
| Mother married or with partner, n (%)      | 870,108 (93%)                  | 31,177 (75%)                           |
| Mother's age, n (%), y                     |                                |                                        |
| ≤ 19                                       | 23,856 (3%)                    | 1,803 (4%)                             |
| 20 - 24                                    | 157,585 (17%)                  | 9,687 (23%)                            |
| 25 - 29                                    | 328,337 (35%)                  | 13,371 (32%)                           |
| 30 - 34                                    | 292,684 (32%)                  | 10,702 (26%)                           |
| 35 - 39                                    | 117,637 (13%)                  | 4,940 (12%)                            |
| ≥ 40                                       | 18,836 (2%)                    | 1,098 (3%)                             |
| Mother's education, mean (SD) <sup>a</sup> | 4.6 (1.7)                      | 3.9 (1.9)                              |
| Father's education, mean (SD) <sup>a</sup> | 4.4 (1.7)                      | 3.7 (1.9)                              |
| Immigrant parents, n (%)                   | 57,888 (6%)                    | 21,036 (51%)                           |
| First birth, n (%)                         | 379,585 (40%)                  | 19,965 (48%)                           |

<sup>a</sup>Classified on 9-level scale with 0 indicating no formal education and 8 indicating doctoral degree. Level 4 indicates 13 years at school.
